# Supplementary material for: Cardiotonic pill attenuates white matter and hippocampal damage via inhibiting microglial activation and downregulating ERK and p38 MAPK signaling in chronic cerebral hypoperfused rat
Source: PubMed Central journal article supplement (PMC4222777; doi:10.1186/1472-6882-13-334), 2013-11-26

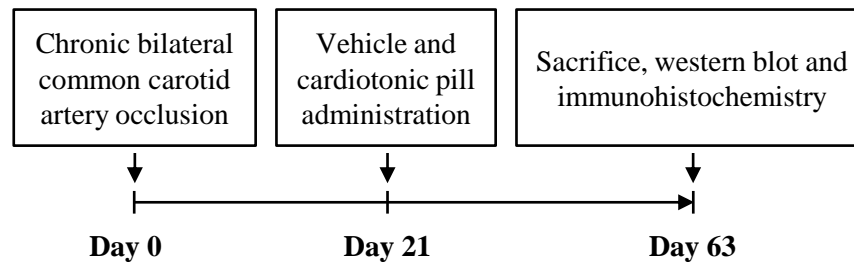

Supplement: 1472-6882-13-334-S1.pdf [file 1472-6882-13-334-S1.pdf]
